# Supplementary material
Source: Springer Nature journal article supplement (https://www.springermedizin.de/resource/supplementary/12986_2011_348_MOESM3_ESM.pdf/25655894)

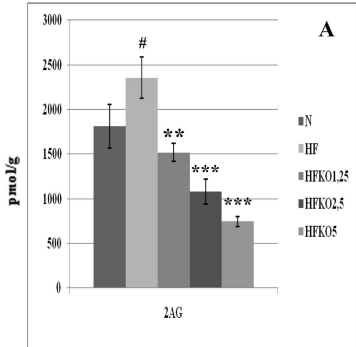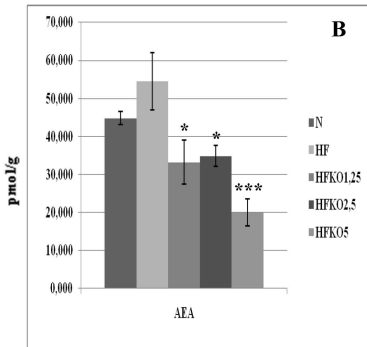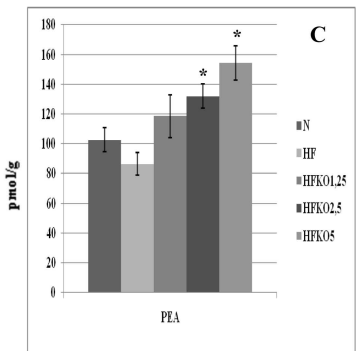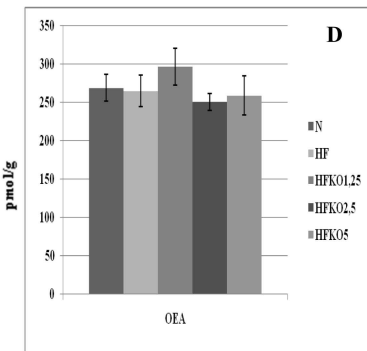

Supplement: MOESM3 [file 25655894]
